1 **Within-host dynamics explain patterns of antibiotic resistance in**  
2 **commensal bacteria**

3

4 Nicholas G. Davies<sup>1,2\*</sup>, Stefan Flasche<sup>1,2</sup>, Mark Jit<sup>1,2,3</sup>, Katherine E. Atkins<sup>1,2</sup>

5

6 <sup>1</sup> Centre for Mathematical Modelling of Infectious Diseases, London School of  
7 Hygiene and Tropical Medicine, London WC1E 7HT, UK.

8 <sup>2</sup> Department for Infectious Disease Epidemiology, Faculty of Epidemiology and

9 Population Health, London School of Hygiene and Tropical Medicine, London

10 WC1E 7HT, UK.

11 <sup>3</sup> Modelling and Economics Unit, Public Health England, London SE1 8UG, UK.

12 \* To whom correspondence should be addressed. E-mail:

13 Nicholas.Davies@lshtm.ac.uk

14 **The spread of antibiotic resistance, a major threat to human health, is**  
15 **poorly understood. Empirically, resistant strains gradually increase in**  
16 **prevalence as antibiotic consumption increases, but current mathematical**  
17 **models predict a sharp transition between full sensitivity and full**  
18 **resistance. In other words, we do not understand what drives persistent**  
19 **coexistence between resistant and sensitive strains of disease-causing**  
20 **bacteria in host populations. Without knowing what drives patterns of**  
21 **resistance, we cannot accurately predict the impact of potential strategies**  
22 **for managing resistance. Here, we show that within-host dynamics—**  
23 **bacterial growth, strain competition, and host immune responses—**  
24 **promote frequency-dependent selection for resistant strains, explaining**  
25 **patterns of resistance at the population level. By capturing these processes**  
26 **in a parsimonious mathematical framework, we resolve a long-standing**  
27 **conflict between theory and observation. Our models capture widespread**  
28 **coexistence for multiple bacteria-drug combinations across 30 European**  
29 **countries and explain associations between carriage prevalence and**  
30 **resistance prevalence among bacterial subtypes. A mechanistic**  
31 **understanding of resistance evolution is needed to accurately forecast the**  
32 **impact and effectiveness of resistance-management strategies.**

33

34 Despite the global public health threat of antibiotic resistance<sup>1,2</sup>, we currently  
35 lack a mechanistic understanding of how resistance spreads in human  
36 populations<sup>3</sup>. This gap in our knowledge is reflected in the inability of  
37 mathematical models to explain why resistance prevalence gradually increases  
38 as we move from countries with low antibiotic consumption to those with high

39 antibiotic consumption<sup>3-8</sup> (Fig. 1A). Although the mechanism driving this pattern  
40 seems intuitively obvious—greater antibiotic consumption selects for more  
41 resistance—the simplest models of disease transmission (Fig. 1B) are unable to  
42 capture the gradual rise that is observed. Instead, these models predict  
43 competitive exclusion<sup>9</sup>—that is, that above a particular level of antibiotic  
44 consumption, resistant strains fully outcompete sensitive strains, while below  
45 this treatment-rate threshold, they are unable to emerge at all (Fig. 1C).

46

47 This theoretical prediction stands in stark contrast to empirical patterns of  
48 widespread coexistence between sensitive and resistant strains, a trend that  
49 holds across multiple bacteria-drug combinations<sup>6-8</sup>. While previous work has  
50 suggested that multiple strain carriage within individuals may promote limited  
51 amounts of coexistence<sup>3, 10</sup>, existing models cannot reproduce coexistence along  
52 the 4- to 20-fold range of treatment rates over which it is observed. Moreover,  
53 the reason why multiple carriage may promote limited coexistence is unclear.  
54 Without identifying an explicit, general mechanism for widespread coexistence,  
55 we will be unable to predict the likely impact of public health interventions for  
56 managing resistance.

57

58 Here, we show that within-host dynamics explain observed patterns of  
59 resistance in commensal bacteria. Specifically, we develop a suite of models that  
60 explicitly integrate within-host bacterial growth, strain competition, and  
61 bacterial subtype-specific host immune responses that, when calibrated to data  
62 across 30 European countries, provides a parsimonious and general explanation  
63 for empirical patterns of resistance in three commensal bacterial species, and

64 also explains patterns of resistance among competing subtypes in the  
65 commensal bacterium *Streptococcus pneumoniae*.

66

## 67 **Results**

68

69 **Existing models fail to capture widespread coexistence.** We begin by  
70 analysing a standard model of resistant disease transmission developed by  
71 Lipsitch and colleagues<sup>3, 10</sup>. A central feature of this model is that hosts can  
72 become dual carriers—that is, carriers of both sensitive and resistant strains  
73 simultaneously—through sequential colonisation events (Fig. 2A). This model  
74 makes two key assumptions: (1) that dual carriage is balanced, with each strain  
75 carried in equal measure; and (2) that if a dual carrier is re-colonised, the  
76 incoming strain “knocks out” one of the two resident strains at random.  
77 Together, these assumptions preserve the crucial requirement of structural  
78 neutrality at the population level<sup>10</sup>, meaning that selection does not produce  
79 coexistence “for free” by artificially promoting transmission of rare strains. In  
80 this “within-host balancing” model, the amount of coexistence is governed by the  
81 parameter  $k$ , the efficiency of co-colonisation relative to single colonisation.  
82 While setting  $k = 0$  eliminates dual carriage and recovers competitive exclusion,  
83 allowing dual carriage ( $0 < k \leq 1$ ) promotes limited coexistence (Fig. 2B). We  
84 calibrated this model to European data on penicillin use and penicillin non-  
85 susceptibility among *S. pneumoniae* (*Methods*). Due to the limited range of  
86 coexistence predicted by the balancing model, we found that it cannot readily  
87 capture observed patterns of resistance<sup>3, 5</sup> (Fig. 2C), even when co-colonisation is  
88 more efficient than single colonisation ( $k > 1$ ; text S2).

89

90 Although the balancing model preserves neutrality at the between-host level<sup>10</sup>,  
91 we argue that it violates the principle of structural neutrality at the within-host  
92 level. Specifically, a structurally-neutral model should not predict that balancing  
93 selection promotes stable coexistence between two strains if the strains are  
94 biologically identical<sup>10</sup>. The balancing model meets this requirement at the  
95 population level<sup>3, 10</sup>. However, at the within-host level, when an invading strain  
96 colonises a host already carrying a larger resident strain, the balancing model  
97 implicitly assumes that the invading strain multiplies within the host—at the  
98 expense of the resident strain—until both strains are present in equal frequency,  
99 even if the two strains are biologically identical. Moreover, if a dual carrier is re-  
100 colonised, knockout immediately eliminates one of the host’s existing strains, an  
101 assumption which simplifies the mathematical model but which does not have a  
102 clear mechanistic explanation. In order to preserve neutral within-host  
103 dynamics, we developed a new model that relaxes these two non-neutral  
104 assumptions.

105

106 **Within-host neutrality captures widespread coexistence.** In our novel  
107 “within-host neutral” model, which exhibits structural neutrality at all levels,  
108 hosts are assumed to have a fixed carrying capacity beyond which bacterial  
109 growth cannot be supported. If a host is already colonised, a new strain can  
110 invade, but rather than reaching the same frequency as the resident strain, we  
111 assume that the new strain does not increase in frequency after co-colonisation,  
112 since the host is already at carrying capacity (Fig. 2D). Strikingly, integrating  
113 within-host neutrality greatly promotes coexistence (Fig. 2E), allowing us to

114 readily capture patterns of *S. pneumoniae* resistance across European countries  
115 (Fig. 2F). We originally developed this model as an individual-based simulation  
116 which allows us to track arbitrary within-host strain frequencies for each host,  
117 but the model can be approximated using a four-state system of differential  
118 equations, which simplifies analysis and model calibration (*Methods*).  
119  
120 It is generally agreed that antibiotic resistance is associated with a fitness cost<sup>11</sup>,  
121 <sup>12</sup>, because in the absence of such a cost, resistant strains would fully outcompete  
122 sensitive strains. We have thus far parameterised this cost by assuming that  
123 resistant strains are associated with reduced transmission. Alternatively, it is  
124 possible to assume that resistant strains suffer reduced within-host growth<sup>11, 12</sup>,  
125 such that a resistant strain will, in the absence of antibiotic treatment, be  
126 outcompeted within the host by any sensitive strains (Fig. 2G). We captured this  
127 process of within-host competition using a five-state differential equation model  
128 based on our within-host neutral model (*Methods*). This addition further expands  
129 the parameter space over which coexistence is maintained (Fig. 2H), improving  
130 the model fit to patterns of *S. pneumoniae* penicillin non-susceptibility (Fig. 2I).  
131  
132 To verify the generality of our results, we re-parameterised the three models for  
133 two additional facultatively-pathogenic commensal bacteria, *Escherichia coli* and  
134 *Staphylococcus aureus* (*Methods*), and recalibrated the models to pan-European  
135 patterns of resistance against the most widely used antibiotics for all three  
136 species, which yielded a further four bacteria-drug combinations<sup>6, 8</sup>. Here, too,  
137 the empirical data are better captured by the within-host neutral models than by  
138 the balancing model (Fig. 3). Using the Akaike Information Criterion to select the

139 most parsimonious model, we found that the within-host competition model has  
140 the most support across all bacteria-drug combinations (Figs. 2, 3).

141

142 **Within-host dynamics promotes coexistence via frequency-dependent**

143 **selection.** Analysis of our model reveals that frequency-dependent selection<sup>13</sup> is  
144 the mechanism through which within-host dynamics promote coexistence. That  
145 is, the within-host processes we have identified result in fitness advantages for  
146 either resistant or sensitive strains when those strains are rare. If resistant cells  
147 colonise a host already carrying a sensitive strain, and that host subsequently  
148 takes antibiotics, the sensitive strain is cleared and the resistant cells can grow to  
149 occupy the host's now-vacated niche; by contrast, if resistant cells colonise a host  
150 already carrying a resistant strain, antibiotic treatment has no such effect. Hence,  
151 resistant cells benefit from a fitness advantage when sensitive-strain carriers are  
152 common. Within-host competition has a complementary effect, providing  
153 sensitive cells with a fitness advantage when resistant-strain carriers are  
154 common, because sensitive cells colonising a resistant-strain carrier can grow  
155 over time to become the dominant strain in the host. Either or both of these  
156 mechanisms can promote stable coexistence by equalising the fitness of resistant  
157 and sensitive strains at intermediate carriage frequencies.

158

159 Identifying the mechanism of frequency-dependent selection helps to explain  
160 why previous model predictions for resistance prevalence are sensitive to a  
161 narrow range of antibiotic treatment rates<sup>3, 5, 10</sup>, and hence have been unable to  
162 support coexistence over the wide range of treatment rates measured  
163 empirically. Specifically, the “balancing” and “knockout” assumptions of the

164 within-host balancing model create a bias against coexistence in two ways. First,  
165 balanced carriage of co-colonising strains decreases rare strains' frequency-  
166 dependent fitness benefit because it reduces the scope for rare strains to grow  
167 within dual carriers. Second, knockout reduces the prevalence of dual carriage by  
168 depleting strain diversity among hosts. Both effects reduce the strength of  
169 frequency-dependent selection for resistance, biasing models against  
170 coexistence.

171

172 **Patterns of coexistence among bacterial serotypes.** Many bacterial species  
173 exhibit extensive diversity in the expression of capsular proteins exposed to host  
174 immune systems, which subdivides species into several distinct “serotypes” that,  
175 like resistant versus sensitive strains, are known to stably coexist in host  
176 populations<sup>14, 15</sup>. Host immune memory can promote coexistence between  
177 serotypes, because more common serotypes are more likely to provoke a host  
178 immune response owing to previous exposure, creating frequency-dependent  
179 selection for serotype diversity<sup>14, 15</sup>. However, similar considerations to those  
180 detailed above reveal that serotype diversity can also be promoted through a  
181 related mechanism that does not require host immune memory. In our within-  
182 host neutral model, coexistence is promoted by resistant strains multiplying to  
183 take the place of co-colonising sensitive strains that are cleared by antibiotic  
184 treatment. A similar mechanism might promote stable coexistence between  
185 commensal bacteria serotypes, so long as—when co-colonising a host—  
186 serotypes can be independently cleared by a host immune response, with any  
187 strains of the same serotype being cleared simultaneously. This would result in a



188 fitness advantage for a strain co-colonising a host carrying a different serotype,  
189 promoting serotype diversity even in the absence of immune memory.

190

191 To test this hypothesis, we extended our individual-based model to track  
192 coexistence between five serotypes differing in their clearance rate, their  
193 transmission rate or their within-host growth rate. We found that independent  
194 clearance of serotypes from co-colonised hosts can promote stable coexistence  
195 between serotypes, even when serotypes exhibit intrinsic fitness differences  
196 (Fig. 4A). Unlike in previous models which have not explicitly tracked within-  
197 host dynamics<sup>14, 15</sup>, we find that acquired immunity is not needed to maintain  
198 limited amounts of serotype diversity. Moreover, we found that resistance  
199 prevalence varied across coexisting serotypes, with the direction of the trend in  
200 resistance prevalence among serotypes depending on whether the cost of  
201 resistance was parameterised as a transmission-rate cost or a growth-rate cost.  
202 When resistance is associated with a transmission-rate cost, resistance is more  
203 strongly selected in fitter serotypes, whether serotypes differ in fitness due to  
204 differences in duration of carriage<sup>4</sup>, transmissibility, or within-host growth (Fig.  
205 4B). This reflects an empirical association between serotype fitness and  
206 resistance prevalence observed in *S. pneumoniae*<sup>4</sup>. By contrast, when resistance  
207 is associated with a within-host growth-rate cost (Fig. 4C), resistance is more  
208 strongly selected in less-fit serotypes (Fig. 4D). Thus, our model would predict  
209 that the association between resistance prevalence and serotype fitness may  
210 depend on the balance between these two putative costs of resistance.

211

212 **Resistance prevalence among pneumococcal serotypes.** Finally, we used this  
213 proof of principle to evaluate carriage distribution and resistance prevalence in a  
214 model with 30 co-circulating *S. pneumoniae* serotypes parameterised with  
215 observed differences in duration of carriage. We found that independent  
216 clearance of serotypes alone was insufficient to support the high diversity of  
217 pneumococcal serotype carriage observed in human populations, with only five  
218 serotypes maintained (text S4). However, introducing serotype-specific  
219 immunity<sup>14</sup> to our within-host neutral framework was sufficient to capture much  
220 of the observed pneumococcal diversity and patterns of resistance among  
221 pneumococcal serotypes (Fig. 5).

222

## 223 **Discussion**

224

225 We have proposed a novel, parsimonious and pathogen-independent  
226 mathematical framework that, unlike previous models, captures empirical  
227 patterns of antibiotic resistance across countries differing in treatment rates and  
228 among serotypes. We argue that frequency-dependent selection drives these  
229 patterns of resistance and that coexistence of sensitive and resistant strains is  
230 promoted by integrating structural neutrality at the within-host level.

231 Frequency-dependent selection has long been known to promote stable  
232 coexistence among animal, plant, and bacterial competitors<sup>16-19</sup>, and we show  
233 here that it could also have a pivotal role in maintaining coexistence between  
234 sensitive and resistant strains of commensal bacteria.

235

236 Although a number of alternative mechanisms that could explain coexistence  
237 between drug-sensitive and resistant pathogens have been proposed<sup>3-5, 20-23</sup>,  
238 some support only modest amounts of coexistence<sup>3, 5</sup>, while other proposed  
239 mechanisms may be difficult to generalize empirically, such as strongly age-  
240 assortative mixing<sup>4</sup>, independent mappings of balancing selection<sup>4</sup>, or specific  
241 immune responses to resistance-associated phenotypes<sup>3, 21-23</sup>. Our framework of  
242 within-host neutrality provides two advances on previous work: it harmonises  
243 pathogen dynamics occurring at the between-host and within-host levels, and it  
244 allows us to better and more parsimoniously capture observed patterns of  
245 resistance prevalence across a range of important bacteria-drug combinations.

246

247 Dual carriage of resistant and sensitive strains, a crucial factor for coexistence, is  
248 generated in our models via sequential colonisation. The empirical prevalence of  
249 dual carriage is not well known, but a study of *S. aureus* carriage in children  
250 found 21% of hosts carried both resistant and sensitive strains<sup>24</sup> and—although  
251 resistance phenotypes were not measured—other studies have found up to 48%  
252 multiple carriage of genetically-distinct *S. pneumoniae* strains<sup>25, 26</sup> and 42%  
253 multiple carriage of virulent *E. coli* strains<sup>27</sup>. These studies find that carriage is  
254 typically dominated by one strain with other strains carried at low frequency,  
255 consistent with our model's carrying-capacity assumptions. Dual carriage could  
256 also occur through *de novo* mutation, which is likely to be especially important  
257 for long-lived chronic infections such as colonisations of the cystic fibrosis lung  
258 by *Pseudomonas aeruginosa*<sup>28, 29</sup>. While it is possible that coexistence is  
259 maintained by forces additional to dual carriage, we suggest that any model

260 incorporating dual carriage should observe within-host neutrality to avoid  
261 biasing against coexistence.  
262  
263 Antibiotic resistance is one of the foremost threats to human health, and  
264 combating this threat will require the global deployment of coordinated  
265 interventions<sup>1,2</sup>. Mathematical models of disease transmission will play a crucial  
266 role in this endeavour, because they can explicitly integrate the mechanisms that  
267 drive resistance evolution in a population-level framework and allow us to  
268 quantify long-term trends as well as the likely impact of any large-scale  
269 interventions for reducing resistance<sup>30</sup>. Providing a framework in which to  
270 answer public health questions will require a balance between mathematical  
271 tractability and identifiability of the models on one side, and necessary  
272 complexity on the other; building on the simple models proposed here will help  
273 to establish that balance. If mathematical models are able to incorporate a truly  
274 mechanistic understanding of resistance, they will be better able to explain  
275 common patterns of resistance and to accurately predict the effect of  
276 interventions at a national and global level<sup>30</sup>. With growing calls for an  
277 integrated and multifaceted approach to the problem of antimicrobial  
278 resistance<sup>1,2</sup>, a new generation of mechanistic mathematical models will be  
279 uniquely placed to support the evidence-based adoption of impactful and cost-  
280 effective strategies.

281 **References and Notes**

282

- 283 1. World Health Organization (2016) *United Nations high-level meeting on*  
284 *antimicrobial resistance*. [http://www.who.int/antimicrobial-](http://www.who.int/antimicrobial-resistance/events/UNGA-meeting-amr-sept2016/en)  
285 [resistance/events/UNGA-meeting-amr-sept2016/en](http://www.who.int/antimicrobial-resistance/events/UNGA-meeting-amr-sept2016/en).
- 286 2. O'Neill J, *ed.* (2016) *Tackling drug-resistant infections globally: final report and*  
287 *recommendations*. <https://amr-review.org/home.html>.
- 288 3. Colijn C, *et al.* (2010) What is the mechanism for persistent coexistence of  
289 drug-susceptible and drug-resistant strains of *Streptococcus pneumoniae*?  
290 *J. R. Soc. Interface* **7**, 905–919.
- 291 4. Lehtinen S, *et al.* (2017) Evolution of antibiotic resistance is linked to any  
292 genetic mechanism affecting bacterial duration of carriage. *Proc Natl Acad*  
293 *Sci USA* **114**, 1075–1080.
- 294 5. Cobey S, *et al.* (2017) Host population structure and treatment frequency  
295 maintain balancing selection on drug resistance. *J R Soc Interface* **14**,  
296 20170295.
- 297 6. European Centre for Disease Prevention and Control. (2017) Antimicrobial  
298 consumption rates by country.  
299 [http://ecdc.europa.eu/en/healthtopics/antimicrobial-resistance-and-](http://ecdc.europa.eu/en/healthtopics/antimicrobial-resistance-and-consumption/antimicrobial-consumption/esac-net-database/Pages/Antimicrobial-consumption-rates-by-country.aspx)  
300 [consumption/antimicrobial-consumption/esac-net-](http://ecdc.europa.eu/en/healthtopics/antimicrobial-resistance-and-consumption/antimicrobial-consumption/esac-net-database/Pages/Antimicrobial-consumption-rates-by-country.aspx)  
301 [database/Pages/Antimicrobial-consumption-rates-by-country.aspx](http://ecdc.europa.eu/en/healthtopics/antimicrobial-resistance-and-consumption/antimicrobial-consumption/esac-net-database/Pages/Antimicrobial-consumption-rates-by-country.aspx).
- 302 7. European Antimicrobial Resistance Surveillance System (2007) *EARSS Annual*  
303 *Report 2007*. Bilthoven: EARSS.
- 304 8. European Centre for Disease Prevention and Control (2017) *Antimicrobial*  
305 *resistance surveillance in Europe 2015. Annual Report of the European*

- 306            *Antimicrobial Resistance Surveillance Network (EARS-Net)*. Stockholm:  
307            ECDC.
- 308    9. Hardin G (1960) The competitive exclusion principle. *Science* **131**, 1292–1297.
- 309    10. Lipsitch M, Colijn C, Cohen T, Hanage WP, Fraser C (2009) No coexistence for  
310            free: neutral null models for multistrain pathogens. *Epidemics* **1**, 2–13.
- 311    11. Andersson DI (2006) The biological cost of mutational antibiotic resistance:  
312            any practical conclusions? *Curr Opin Microbiol* **9**, 461–465.
- 313    12. Andersson DI, Hughes D (2010) Antibiotic resistance and its cost: is it  
314            possible to reverse resistance? *Nat Rev Microbiol* **8**, 260–271.
- 315    13. Ayala FJ, Campbell CA (1974) Frequency-dependent selection. *Ann Rev Ecol*  
316            *Syst* **5**, 115–138.
- 317    14. Cobey S, Lipsitch M. (2012) Niche and neutral effects of acquired immunity  
318            permit coexistence of pneumococcal serotypes. *Science* **335**, 1376–1380.
- 319    15. Flasche S, *et al.* (2013) The impact of specific and non-specific immunity on  
320            the ecology of *Streptococcus pneumoniae* and the implications for  
321            vaccination. *Proc R Soc B* **280**, 20131939.
- 322    16. Ayala FJ (1971) Competition between species: frequency dependence. *Science*  
323            **171**, 820–824.
- 324    17. Sinervo B, Lively CM (1996) The rock-paper-scissors game and the evolution  
325            of alternative male strategies. *Nature* **380**, 240–243.
- 326    18. Gigord LDB, Macnair MR, Smithson A (2001) Negative frequency-dependent  
327            selection maintains a dramatic flower color polymorphism in the  
328            rewardless orchid *Dactylorhiza sambucina* (L.) Soð. *Proc Natl Acad Sci USA*  
329            **98**, 6253–6255.

- 330 19. Rainey PB, Travisano M (1998) Adaptive radiation in a heterogeneous  
331 environment. *Nature* **394**, 69–72.
- 332 20. Austin DJ, Kristinsson KG, Anderson RM (1999) The relationship between the  
333 volume of antimicrobial consumption in human communities and the  
334 frequency of resistance. *Proc Natl Acad Sci USA* **96**, 1152–1156.
- 335 21. Dietz K (1979) Epidemiologic interference of virus populations. *J Math Biol* **8**,  
336 291–300.
- 337 22. Gupta S, Swinton J, Anderson RM (1994) Theoretical studies of the effects of  
338 heterogeneity in the parasite population on the transmission dynamics of  
339 malaria. *Proc R Soc Lond B* **256**, 231–238.
- 340 23. Lipsitch M (1997) Vaccination against colonizing bacteria with multiple  
341 serotypes. *Proc Natl Acad Sci USA* **94**, 6571–6576.
- 342 24. Mongkolrattanothai K, *et al* (2011) Simultaneous carriage of multiple  
343 genotypes of *Staphylococcus aureus* in children. *J Med Microbiol* **60**, 317–  
344 322.
- 345 25. Kamng'ona AW, *et al.* (2015) High multiple carriage and emergence of  
346 *Streptococcus pneumoniae* vaccine serotype variants in Malawian  
347 children. *BMC Inf Diseases* **15**, 234.
- 348 26. Turner P, *et al.* (2011) Improved detection of nasopharyngeal cocolonization  
349 by multiple pneumococcal serotypes by use of latex agglutination or  
350 molecular serotyping by microarray. *J Clin Microbiol* **49**, 1784–1789.
- 351 27. Martinez-Medina M, *et al.* (2009) Molecular diversity of *Escherichia coli* in the  
352 human gut: new ecological evidence supporting the role of adherent-  
353 invasive *E. coli* (AIEC) in Crohn's disease. *Inflamm Bowel Dis* **15**, 872–882.

- 354 28. Smith EE, *et al.* (2006) Genetic adaptation by *Pseudomonas aeruginosa* to the  
355           airways of cystic fibrosis patients. *Proc Natl Acad Sci USA* **103**, 8487–  
356           8492.
- 357 29. Yang L, *et al.* (2011) Evolutionary dynamics of bacteria in a human host  
358           environment. *Proc Natl Acad Sci USA* **108**, 7481–7486.
- 359 30. Atkins KE, *et al.* Use of mathematical modelling to assess the impact of  
360           vaccines on antibiotic resistance. *Lancet Infect Dis*, in press.
- 361 31. Chewapreecha C, *et al.* (2014) Dense genomic sampling identifies highways  
362           of pneumococcal recombination. *Nat Genet* **46**, 305–309.
- 363 32. Bogaert D, *et al.* (2004) Colonisation by *Streptococcus pneumoniae* and  
364           *Staphylococcus aureus* in healthy children. *Lancet* **363**, 1871–1872.
- 365 33. Goossens MC, Catry B, Verhaegen J (2013) Antimicrobial resistance to  
366           benzylpenicillin in invasive pneumococcal disease in Belgium, 2003–  
367           2010: the effect of altering clinical breakpoints. *Epidemiol Infect* **141**,  
368           490–495.
- 369 34. Ter Braak CJF (2006) A Markov chain Monte Carlo version of the genetic  
370           algorithm differential evolution: easy Bayesian computing for real  
371           parameter spaces. *Stat Comp* **16**, 239–249.
- 372 35. Nelder JA, Mead R (1965) A simplex method for function minimization. *Comp*  
373           *J* **7**, 308–313.
- 374 36. Li B, *et al.* (2012) Duration of stool colonization in healthy medical students  
375           with extended-spectrum- $\beta$ -lactamase-producing *Escherichia coli*.  
376           *Antimicrob Agents Chemother* **56**, 4558–4559.



- 377 37. Apisarnthanarak A, Bailey TC, Fraser VJ (2008) Duration of stool colonization  
378 in patients infected with extended-spectrum  $\beta$ -lactamase-producing  
379 *Escherichia coli* and *Klebsiella pneumoniae*. *Clin Infect Dis* **46**, 1322–1333.
- 380 38. Shenoy ES, Paras ML, Noubary F, Walensky RP, Hooper DC (2014) Natural  
381 history of colonization with methicillin-resistant *Staphylococcus aureus*  
382 (MRSA) and vancomycin-resistant *Enterococcus* (VRE): a systematic  
383 review. *BMC Infect Dis* **14**, 177.
- 384 39. Larsson AK, *et al.* (2011) Duration of methicillin-resistant *Staphylococcus*  
385 *aureus* colonization after diagnosis: A four-year experience from southern  
386 Sweden. *Scand J Inf Dis* **43**, 456–462.
- 387 40. Martinez-Medina M, *et al.* (2009) Molecular diversity of *Escherichia coli* in the  
388 human gut: new ecological evidence supporting the role of adherent-  
389 invasive *E. coli* (AIEC) in Crohn's disease. *Inflamm Bowel Dis* **15**, 872–882.
- 390 41. European Centre for Disease Prevention and Control (2014) *Surveillance of*  
391 *antimicrobial consumption in Europe 2011*. Stockholm: ECDC.  
392 <<https://ecdc.europa.eu/sites/portal/files/media/en/publications/Publications/antimicrobial-consumption-europe-surveillance-2011.pdf>>.

394

395 **Acknowledgements:** We thank M. Davies for assistance. NGD, MJ and KEA were  
396 funded by the National Institute for Health Research Health Protection Research  
397 Unit (NIHR HPRU) in Immunisation at the London School of Hygiene and  
398 Tropical Medicine in partnership with Public Health England (PHE). The views  
399 expressed are those of the authors and not necessarily those of the NHS, the  
400 NIHR, the Department of Health or PHE. The authors declare no competing

401 financial interests. NGD, SF, MJ and KEA conceived the study; NGD performed the  
402 analyses; NGD and KEA drafted the manuscript, which all authors revised.

403

404 **Supplementary Materials**

405 Materials and Methods

406 Tables S1–S2

407 Figs S1–S13

408 References (32 – 41)

409 **Figures**

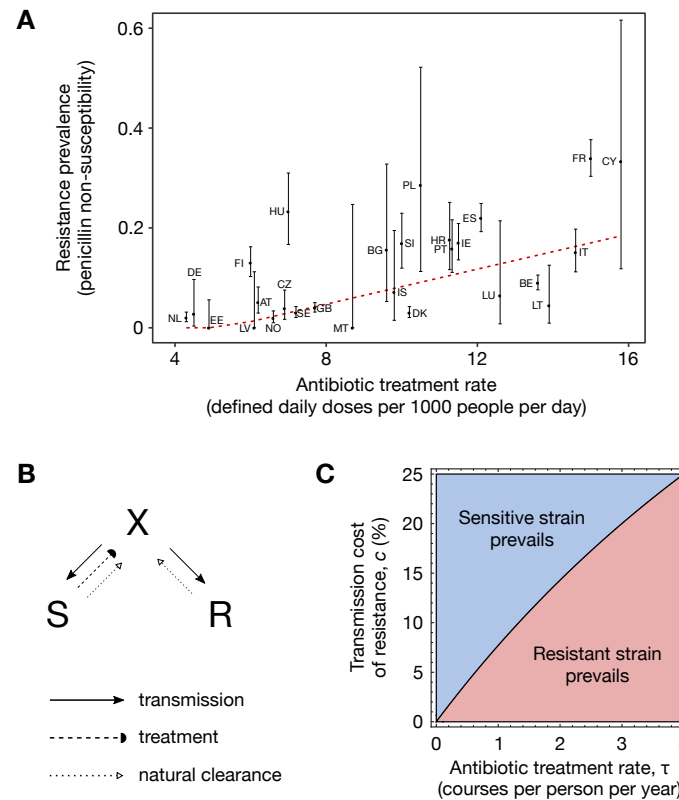

410

411 **Fig. 1.** The problem of coexistence. **(A)** The prevalence of penicillin non-  
 412 susceptible isolates of *S. pneumoniae* across 27 European countries  
 413 illustrates widespread coexistence. This pattern of gradual increase of resistance  
 414 with the antibiotic treatment rate holds across many pathogen-drug  
 415 combinations<sup>6-8</sup>. **(B)** A simple two-strain single-carriage model defined by the  
 416 system of ordinary differential equations  $\frac{dS}{dt} = \beta SX - (u + \tau)S$ ,  $\frac{dR}{dt} = \beta(1 -$   
 417  $c)RX - uR$ ,  $X = 1 - S - R$ , with  $X$  non-carriers,  $S$  sensitive-strain carriers, and  $R$   
 418 resistant-strain carriers. Here,  $\beta$  is the rate of transmission (solid arrows),  $\tau$  is  
 419 the rate of antibiotic treatment (dashed arrow),  $u$  is the rate of natural clearance  
 420 (dotted arrows), and  $c$  is the transmission cost of resistance. **(C)** Contrary to  
 421 observed patterns of coexistence, the single-carriage model predicts competitive

422 exclusion, with the sensitive strain dominating the resistant strain if  $\tau > cu/(1-c)$ ;

423 here,  $\beta = 4 \text{ months}^{-1}$ ,  $u = 1 \text{ months}^{-1}$ .

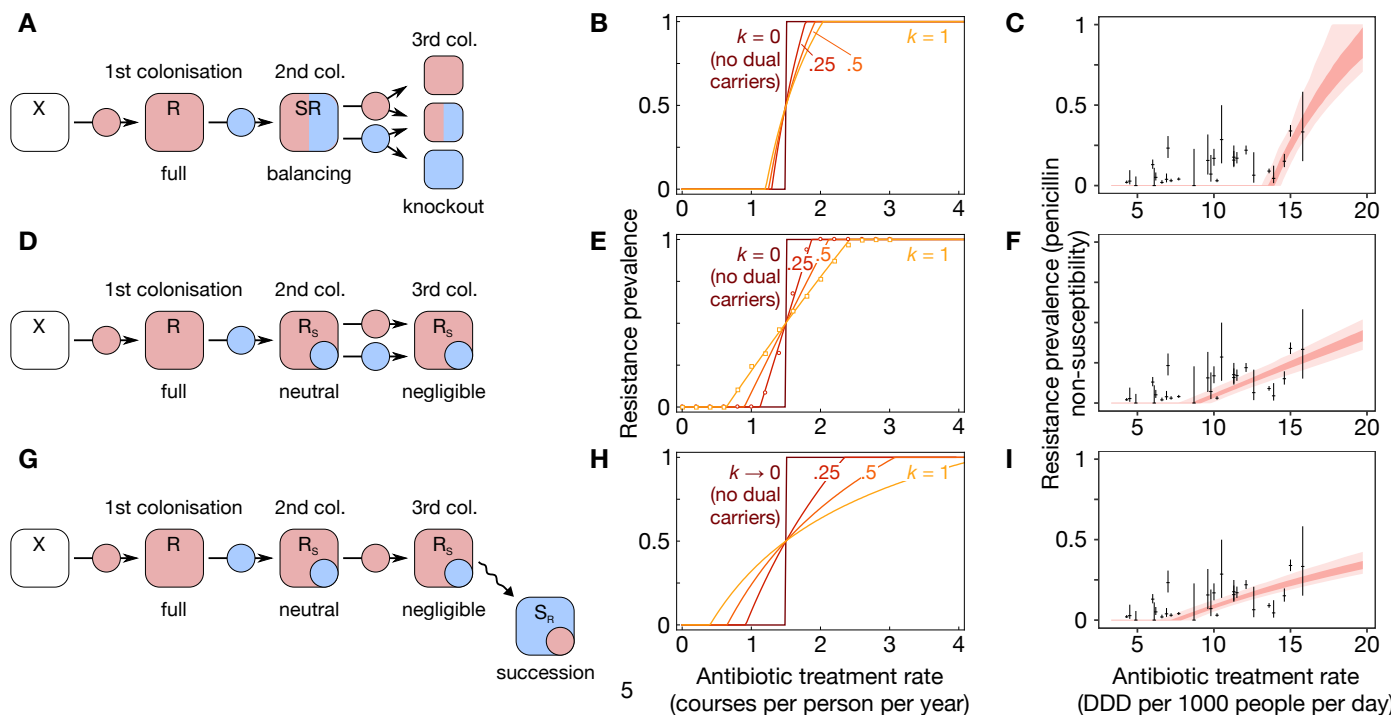

424

425 **Fig. 2.** Three models of dual carriage. **(A)** The within-host balancing model<sup>10</sup>

426 extends the single-carriage model (Fig. 1B) by permitting simultaneous dual

427 carriage. An example sequence of colonisation events illustrates equal co-

428 colonisation and knockout. **(B)** Although coexistence increases with the

429 efficiency of multiple carriage,  $k$ , the region of coexistence remains small for the

430 within-host balancing model. **(C)** When calibrated to penicillin non-susceptibility

431 in *S. pneumoniae* across European countries, the balancing model does not

432 capture widespread coexistence. **(D)** The same example sequence of colonisation

433 events as in panel **A** illustrates the absence of the balancing and knockout

434 mechanisms in the within-host neutral model. **(E)** Integrating within-host

435 neutrality expands the region of coexistence. Overlaid markers are results from

436 our individual-based model with no limit to the number of co-colonisation states

437 (see Methods). **(F)** Within-host neutrality yields a better fit to empirical data. **(G)**

438 The same example sequence illustrates frequency-dependent selection acting on

439 the sensitive strain when within-host competition is added to the within-host  
440 neutral model. **(H)** Within-host competition further increases coexistence and **(I)**  
441 the resulting model provides the best fit to the data (relative likelihood of 1.0 for  
442 the within-host competition model, 0.635 for the within-host neutral model, and  
443  $4.49 \times 10^{-5}$  for the balancing model).

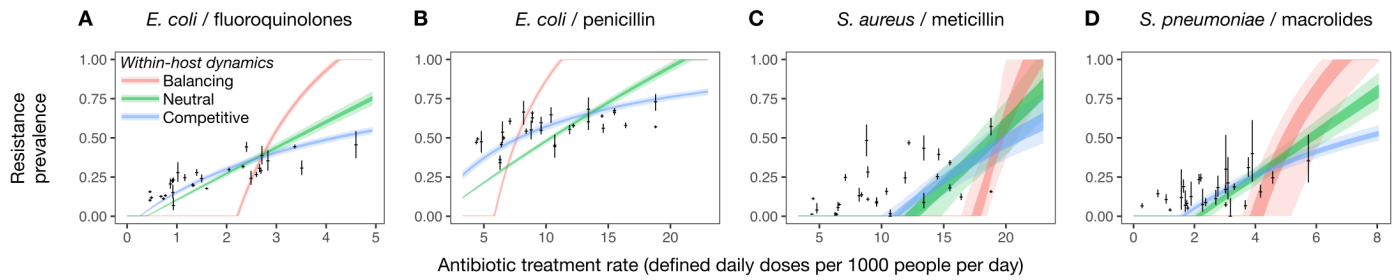

444

445 **Fig. 3.** Within-host dynamics explain patterns of resistance across commensal  
446 bacteria. Within-host neutral models with (blue) or without (green) within-host  
447 competition capture persistent coexistence, while the balancing model (red)  
448 does not. Compared with the within-host neutral model with strain competition,  
449 the relative likelihood of the balancing and neutral models are, respectively, **(A)**  
450  $2.45 \times 10^{-127}$ , and  $3.85 \times 10^{-15}$ ; **(B)**  $3.22 \times 10^{-163}$  and  $3.41 \times 10^{-28}$ ; **(C)**  $6.33 \times 10^{-4}$  and  
451  $0.141$ ; and **(D)**  $6.57 \times 10^{-15}$  and  $2.28 \times 10^{-3}$ .

452

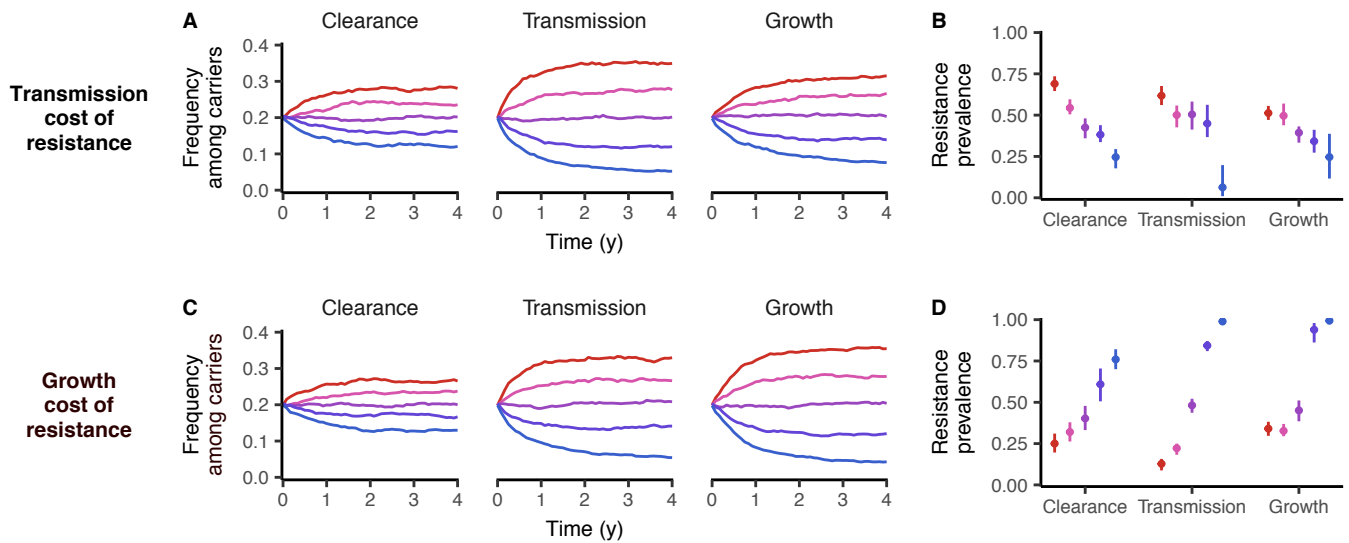

453

454 **Fig. 4.** Within-host dynamics promote coexistence between serotypes, and  
455 intrinsic fitness differences between serotypes are correlated with resistance  
456 prevalence within serotypes. **(A)** In a model with five serotypes differing in  
457 various measures of intrinsic fitness, independent clearance of serotypes from  
458 hosts supports limited coexistence between serotypes even in the absence of  
459 immune memory. **(B)** When resistance carries a transmission-rate cost, fitter  
460 serotypes are more strongly selected for resistance. **(C, D)** When resistance  
461 carries a growth-rate cost, fitter serotypes are less strongly selected for  
462 resistance. Serotypes are assumed to differ in clearance rate ( $u = 0.96, 0.98, 1.0,$   
463  $1.02, 1.04$ ), transmission rate ( $\beta = 2.2, 2.1, 2.0, 1.9, 1.9$ ), or within-host growth  
464 rates (growth rate penalties  $\alpha = 0, 0.015, 0.03, 0.045, 0.06$ ; see Methods). In each  
465 plot, the fittest serotype is shown in red. The mean and 95% interquartile range  
466 for the last 50 years of the 100-year simulation is shown. Resistance is assumed  
467 to be associated with either a 10% transmission-rate cost (A, B) or a growth-rate  
468 penalty of 0.025 (C, D).

469



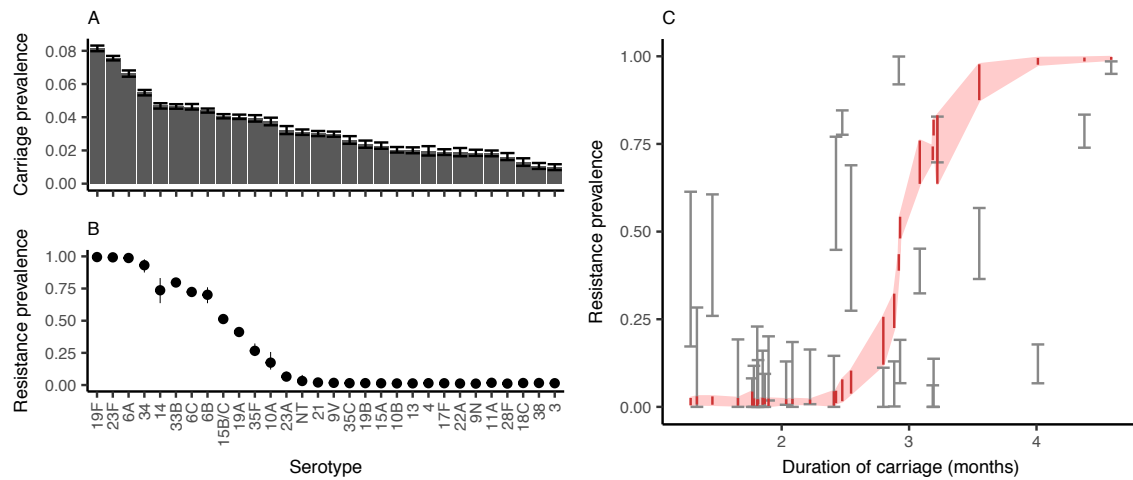

470

471 **Fig. 5.** Resistance prevalence among pneumococcal serotypes. **(A)** We  
472 parameterised our individual-based within-host neutral model to simulate a  
473 population in which 30 common pneumococcal serotypes circulate, using a  
474 previously-published data set<sup>4, 31</sup> to assign measured durations of carriage to  
475 each serotype. Serotypes are otherwise undifferentiated and we assume no  
476 within-host competition. Incorporating a simple model of host immune memory  
477 (see *Methods*) recovers extensive diversity in **(A)** pneumococcal carriage and **(B)**  
478 resistance prevalence. **(C)** The positive relationship between duration of carriage  
479 and resistance prevalence observed empirically (black error bars, showing 95%  
480 confidence intervals for duration of carriage) is recovered in the model (red  
481 ribbon, showing 95% interquartile range for each serotype in the final 50 years  
482 of the 100-year simulation).

## 483 **Materials and Methods**

484

### 485 Systems of ordinary differential equations

486

487 In the main text, we discuss four epidemiological models of antibiotic resistance:  
488 a single-carriage model, and three multiple-carriage models (the within-host  
489 balancing model, the within-host neutral model, and the within-host competition  
490 model). These models can be analysed using the systems of differential equations  
491 presented in this section, or using an alternative stochastic individual-based  
492 model formulation which is presented below (see *Individual-based model*). The  
493 ordinary differential equation models can simulate two strains at a time  
494 (sensitive and resistant), and are used for exposition of the key principles and for  
495 model calibration (Figs. 1–3). The individual-based models can simulate an  
496 arbitrary number of strains, and are used for validation of the ordinary  
497 differential equation models (Fig. 2) and for analysing serotype dynamics (Figs. 4  
498 and 5).

499

500 *Single-carriage model* — The single-carriage model is given by

501

$$502 \quad \frac{dS}{dt} = \beta SX - (u + \tau)S$$

$$503 \quad \frac{dR}{dt} = \beta(1 - c)RX - uR$$

$$504 \quad X = 1 - S - R. \quad (1)$$

505

506 Here,  $S = S(t)$  is the fraction of sensitive strain carriers in the population;  $R = R(t)$   
507 is the fraction of resistant strain carriers in the population; and  $X = X(t)$  is the  
508 fraction of non-carriers. The parameter  $\beta$  is the person-to-person transmission  
509 rate of the sensitive strain,  $u$  is the natural clearance rate,  $\tau$  is the per capita rate  
510 of antibiotic treatment, and  $c$  is the transmission cost of resistance. Here, the  
511 resistance prevalence is  $\rho = R/(1-X)$ .

512

513 *Within-host balancing model* — Following previous work<sup>3,10</sup>, the balancing  
514 model is given by

515

$$516 \quad \frac{dS}{dt} = \beta S_{tot} X - (u + \tau)S - k\beta(1 - c)R_{tot}S + \frac{k\beta S_{tot}D}{2}$$

$$517 \quad \frac{dR}{dt} = \beta(1 - c)RX - uR - k\beta S_{tot}R + \frac{k\beta(1-c)R_{tot}D}{2} + \tau D$$

$$518 \quad \frac{dD}{dt} = k\beta(1 - c)R_{tot}S + k\beta S_{tot}R - (u + \tau)D - k\beta S_{tot}D - k\beta(1 - c)R_{tot}D$$

$$519 \quad X = 1 - S - R - D . \quad (2)$$

520

521 Here, the additional compartment  $D = D(t)$  is the fraction of dual carriers in the  
522 population ( $SR$  carriers in Fig. 2A of the main text),  $k$  is the efficiency of multiple  
523 colonisation relative to single colonisation, and  $S_{tot} = S + D/2$  and  $R_{tot} = R + D/2$   
524 give the effective population burden of sensitive- and resistant-strain  
525 colonisation, respectively. The resistance prevalence is  $\rho = R_{tot}/(1-X)$ .

526

527 *Within-host neutrality model* — The novel neutral model is given by

528

$$529 \quad \frac{dS}{dt} = \beta(S + S_R)X - (u + \tau)S - k\beta RS$$

530 
$$\frac{dR}{dt} = \beta(1 - c)RX - uR + \tau S_R$$

531 
$$\frac{dS_R}{dt} = k\beta(1 - c)RS - (u + \tau)S_R$$

532 
$$X = 1 - S - R - S_R . \quad (3)$$

533

534 Here, the compartment  $S_R = S_R(t)$  captures the fraction of the population  
535 predominantly colonised with sensitive bacteria, but also carrying a small  
536 amount of resistant bacteria that are carried in insufficient quantity to transmit,  
537 and  $S + S_R$  gives the effective population burden of sensitive-strain colonisation.  
538 The corresponding  $R_S$  compartment is omitted as it does not impact upon the  
539 overall resistance prevalence in this model,  $\rho = R/(1-X)$ ; however, for tracking  
540 the overall prevalence of dual carriers (both  $S_R$  and  $R_S$ ), the full neutral model can  
541 be recovered from equations 4 below by setting  $b = 0$ .

542

543 *Within-host competition model* — The neutral model with within-host  
544 competition is given by

545

546 
$$\frac{dS}{dt} = \beta(S + S_R)X - (u + \tau)S - k\beta(R + R_S)S$$

547 
$$\frac{dR}{dt} = \beta RX - uR + \tau(S_R + R_S) - k\beta(S + S_R)R$$

548 
$$\frac{dS_R}{dt} = k\beta(R + R_S)S - (u + \tau)S_R + bR_S$$

549 
$$\frac{dR_S}{dt} = k\beta(S + S_R)R - (u + \tau)R_S - bR_S$$

550 
$$X = 1 - S - R - S_R - R_S . \quad (4)$$

551

552 Here, the  $R_S$  compartment captures dual carriers predominantly colonised with  
553 resistant bacteria plus a small amount of sensitive bacteria, and  $b$  captures the  
554 within-host benefit of sensitivity, *i.e.* the rate at which  $R_S$  carriers become  $S_R$   
555 carriers. The resistance prevalence is  $\rho = (R + R_S)/(1-X)$ .

556

557 *Ordinary differential equation solutions* — All models are solved by setting single-  
558 carriage compartments ( $S$  and  $R$ ) equal to 0.001 and all dual-carriage  
559 compartments to 0, then integrating the systems of ordinary differential  
560 equations numerically in C++ using the Runge–Kutta Dorman–Prince method  
561 until they reach equilibrium.

562

### 563 Individual-based model

564

565 The individual-based model follows the same logic as the ordinary differential  
566 equation models, except it can simulate more than two strains simultaneously  
567 and within-host dynamics are simulated more explicitly.

568

569 In the individual-based model, hosts are indexed by  $i \in 1 \dots N$ , where  $N$  is the  
570 population size, and there are  $M$  strains indexed by  $j \in 1 \dots M$ . Each host is  
571 characterised by a vector  $(f_{i,1}, f_{i,2}, \dots, f_{i,M})$  giving the load of each strain colonising  
572 the host, where  $0 \leq f_{ij} \leq 1$  for all  $i, j$  and the host's total bacterial load is  $f_i = \sum_j f_{ij}$ .  
573 The force of infection of strain  $j$  is  $\lambda_j = (\beta/N) \sum_i q_i (1-c_j) f_{ij}$ , where  $\beta$  is the basic  
574 transmission rate,  $c_j$  is the transmission cost associated with strain  $j$ ,  $q_i = 0$  if  $f_i =$   
575  $0$ , and  $q_i = 1/f_i$  if  $f_i > 0$ ; that is, hosts with no bacterial load are not infectious, but  
576 all hosts with any nonzero bacterial load are assumed to be equally infectious,

577 aside from differences in the transmission cost associated with each of their  
578 carried strains. Henceforth, we omit host subscripts  $i$  to focus on a single host.  
579  
580 The model proceeds in discrete time steps. Each time step, hosts may or may not  
581 experience a series of “events” (colonisation, treatment, or natural clearance)  
582 and then their strain carriage is “updated” according to a series of rules. For a  
583 time step  $\Delta t$ , an event which occurs at rate  $r$  over the whole population is  
584 assumed to occur to each host with probability  $r\Delta t$ . Colonisation events occur at  
585 rate  $\lambda_j$  for each strain  $j$  if a host is uncolonised and rate  $k\lambda_j$  if a host is already  
586 colonised. When a host is colonised by strain  $j$ , the host’s carriage of that strain is  
587 increased by the “germ size”  $\iota$ , where  $\iota \ll 1$ , so we have  $f_j' = f_j + \iota$ , *i.e.*  
588 colonisation by strain  $j$  increases the host’s carriage of that strain by  $\iota$  while  
589 leaving carriage of other strains unaffected. Additionally, hosts are colonised by  
590 importation of strains at a low rate  $\omega = 1 \times 10^{-5}$  to prevent stochastic elimination  
591 of strains at low carriage frequencies<sup>14</sup>. Treatment events occur at rate  $\tau$ . When a  
592 host undergoes treatment, the host’s carriage of each strain becomes  $f_j' = Q_j f_j$   
593 for all  $j$ , where  $Q_j = 0$  for sensitive strains and  $Q_j = 1$  for resistant strains, *i.e.* all  
594 sensitive strains are set to zero frequency. Clearance events occur at rate  $u_s$  for  
595 each serotype  $s$ ; each strain  $j$  is associated with a serotype  $s_j$ , and there may be  
596 more than one strain with the same serotype. When a host undergoes natural  
597 clearance, the host’s carriage of each strain becomes  $f_j' = 0$  for all  $j$  for which  $s_j =$   
598  $s$ , *i.e.* carriage of all strains of serotype  $s$  are set to zero while carriage of other  
599 strains is unaffected.  
600

601 Once all “events” for a time step have been done, each host is “updated”  
602 according to the following rules. Under the within-host neutral model, total  
603 strain carriage for colonised hosts is always maintained at the carrying capacity  
604 of the host (*i.e.*  $f = \sum f_j = 1$ ). Specifically, a host’s bacterial load becomes  $f_j' = f_j/f$   
605 for all  $j$ . Under the within-host competition model, strain dynamics are modelled  
606 using an ordinary differential equation model of logistic growth and cell death;  
607 that is, we integrate from time  $t$  to time  $t + \Delta t$  the differential equations defined  
608 by

609

$$610 \quad \frac{df_j}{dt} = f_j(\mu(1 - \alpha_j)\left(1 - \frac{f}{K}\right) - \nu) \quad (5)$$

611

612 for all strains  $j$ , where  $\mu$  is the basic growth rate,  $\alpha_j$  is the growth-rate penalty for  
613 strain  $j$ ,  $K$  is the host density regulation constant, and  $\nu$  is the cell death rate. For  
614 all simulations of the within-host competition model, we assume  $\mu = 200$ ,  $\nu =$   
615  $100$ , and  $K = 2$ , which maintains total strain carriage for each host at  $f = 1$  when  
616 no strain has a growth-rate penalty. The model proceeds in discrete time steps of  
617  $\Delta t = 0.001$  or  $\Delta t = 0.005$  months.

618

619 *Host immune memory*

620

621 When modelling the full range of pneumococcal serotypes (Fig. 5), we simulate  
622 host immune memory as follows. A host who has previously cleared a strain of  
623 serotype  $s$  (*i.e.* through natural clearance only, not treatment) cannot be re-  
624 infected by that serotype. However, hosts are randomly cleared of their immune

625 memory at rate  $1/a_{\max}$ , where  $a_{\max}$  is the maximum host age simulated in the  
626 model, which approximates new hosts entering the population at birth at the  
627 same rate that hosts leave the population due to aging. We assume  $a_{\max} = 60$   
628 months, reflecting the relative importance of pneumococcal transmission in  
629 hosts aged 5 years or under<sup>3, 32</sup>.

630

### 631 Model parameterisation and calibration

632

633 We calibrated the models using European Centre for Disease Prevention and  
634 Control data on penicillin consumption<sup>6</sup> and the prevalence of penicillin non-  
635 susceptibility among *S. pneumoniae* invasive isolates<sup>7</sup> from 2007 for 27  
636 European countries. We focused on the year 2007 for this data set as criteria for  
637 penicillin non-susceptibility in *S. pneumoniae* were changed in some countries  
638 after this year, yielding inconsistencies in resistance data between countries<sup>3, 33</sup>.

639 For calibration to all other bacteria-drug combinations, we used data for the  
640 same 27 countries collected in 2015, the most recent year for which data are  
641 available<sup>6, 8</sup>. Antibiotic consumption rates were given in defined daily doses  
642 (DDD) per thousand people; we converted these to overall treatment rates by  
643 assuming that 10 DDD comprise one treatment course for penicillin<sup>4</sup> and  
644 fluoroquinolones, while 7 DDD comprise one treatment course for macrolides.

645

646 We used Markov chain Monte Carlo with differential evolution<sup>34</sup> to calibrate the  
647 model output to empirical data. We assumed that the number of resistant  
648 isolates tested in a given country follows a binomial distribution with success  
649 probability drawn from a beta distribution, with the model-predicted resistance



650 prevalence as the mode of the beta distribution. Setting the success probability  
 651 as a random variable allowed us to account for between-country variation in  
 652 resistance prevalence not captured by our dynamic model. The likelihood of the  
 653 observed resistance prevalence for bacteria-antibiotic set  $j$  across all countries,  
 654  $\mathbf{d}_j$ , given the model predicted resistance prevalence,  $\rho_j$ , and prevalence of  
 655 carriage,  $Y_j$ , is

656

$$L_j(\mathbf{d}_j | \rho_j, Y_j) = \prod_{i=1}^{C_j} \left( [Y_j^{(0)} \leq Y(\tau_{i,j}) \leq Y_j^{(1)}] \int_{x=0}^1 \text{Beta}(x | \omega = \rho_j(\tau_{i,j}), \kappa = \kappa_j^*) \text{Bin}(r_{i,j} | n_{i,j}, x) dx \right).$$

657

658 Here,  $[Y_j^{(0)} \leq Y(\tau_{i,j}) \leq Y_j^{(1)}]$  is 1 if  $Y(\tau_{i,j})$  lies between  $Y_j^{(0)}$  and  $Y_j^{(1)}$ , which are the  
 659 lower and upper bounds of duration of carriage, respectively, and 0 otherwise;  
 660  $\text{Beta}(x | \omega, \kappa) = x^{\alpha-1} (1-x)^{\beta-1} \Gamma(\alpha+\beta) / (\Gamma(\alpha)\Gamma(\beta))$  |  $\alpha = \omega(\kappa-2) + 1$ ,  $\beta = (1-\omega)(\kappa-2)+1$  is the  
 661 beta distribution probability density with mode  $\omega$  and concentration  $\kappa$ ; and  
 662  $\text{Bin}(r | n, x) = \binom{n}{r} x^r (1-x)^{n-r}$  is the binomial distribution probability density.  
 663 There are  $C_j$  countries in the data set  $j$  labelled  $i = 1 \dots C_j$ ; for a country  $i$  and  
 664 bacteria-antibiotic set  $j$ , the measured antibiotic use is  $\tau_{i,j}$ , the number of samples  
 665 taken of a particular bacteria is  $n_{i,j}$ , and the number of those samples tested as  
 666 non-susceptible to the particular antibiotic is  $r_{i,j}$ . The model prediction for  
 667 resistance prevalence given treatment rate  $\tau$  is  $\rho_j(\tau)$ , the model prediction for  
 668 prevalence of carriage given treatment rate  $\tau$  is  $Y_j(\tau)$ , and the estimated  
 669 concentration around the best-fit line, estimated from the data, is  $\kappa_j^*$ .

670

671 To estimate the concentration  $\kappa_j^*$  from the resistance prevalence data, we used a  
672 truncated line function  $f(\tau) = \max(0, a + g\tau)$  as the modal antibiotic resistance  
673 prevalence and fixed  $\kappa_j^*$  as the concentration. We calculated the maximum  
674 likelihood estimates of  $a_j^*$ ,  $g_j^*$ , and  $\kappa_j^*$  by using the Nelder-Mead algorithm<sup>35</sup> to  
675 maximize the following likelihood function:

676

$$L_j^{(1)}(a_j^*, g_j^*, \kappa_j^*) \\ = \prod_{i=1}^{c_j} \int_{x=0}^1 \text{Beta}(x | \omega = \max(0, a_j^* \tau_{i,j} + g_j^*), \kappa = \kappa_j^*) \text{Bin}(r_{i,j} | n_{i,j}, x) dx$$

677

678 Priors for all model fitting were identified from the literature and were bacteria-  
679 specific (see below).

680

681 For illustrative purposes, the parameters  $c$  and  $b$  for Fig. 2B, E, H were chosen  
682 such that  $\tau = 1.5$  courses per person per year would lead to 50% resistance  
683 prevalence. This  $\tau$  was chosen to roughly coincide with *S. pneumoniae* empirical  
684 data<sup>6,8</sup>. Other parameters used were  $\beta = 4$ ,  $u = 1$  (ref. 3) and  $k$  as given in the  
685 figure.

686

687 *Priors for duration of carriage*

688

689 For *S. pneumoniae*, we assume an average duration of carriage of 1 month (ref.  
690 3), giving a clearance rate  $u = 1$  months<sup>-1</sup>. For *E. coli*, we assume that the average

691 duration of carriage is 59 to 98 days<sup>36,37</sup>, and accordingly set a uniform prior for  
692  $u$  over the range 0.3–0.5 months<sup>-1</sup>. For *S. aureus*, we assume a duration of  
693 carriage of 3.3 months (estimated from ambulatory patients clearing MRSA<sup>38</sup>) to  
694 5.9 months (ref. 39), and accordingly set a uniform prior for  $u$  over the range  
695 0.17–0.3 months<sup>-1</sup>.

696

697 The transmission parameter,  $\beta$ , is constrained by the likelihood function (see  
698 below), so we set a uniform prior on  $\beta$  wide enough to overlap the full range of  
699 observed carriage prevalence,  $Y$ , given the range of clearance rates  $u$  and  
700 treatment rates  $\tau$  (i.e.  $Y = 1 - (u + \tau)/\beta$  for the sensitive strain alone, and  $Y = 1 -$   
701  $u/(\beta(1-c))$  for the resistant strain alone). Specifically, for *S. pneumoniae*, we use  
702 the range 1–6; for *E. coli*, we use the range 1–10; and for *S. aureus*, we use the  
703 range 0.1–2.

704

705 *Likelihood ranges for carriage prevalence*

706

707 In the main text, we detail how the likelihood function used in model fitting  
708 constrains model output such that all countries must exhibit a prevalence of  
709 carriage  $Y$  such that  $Y^{(0)} \leq Y \leq Y^{(1)}$ . For *S. pneumoniae*, we follow Colijn *et al.*<sup>3</sup> in  
710 assuming  $0.2 \leq Y \leq 0.8$  in children. For *E. coli*, we restrict our attention to  
711 extraintestinal pathogenic *E. coli* (ExPEC), a subset of *E. coli* that is responsible  
712 for most invasive infections, and assume  $0.499 \leq Y \leq 0.942$ , which is derived from  
713 95% confidence intervals around the observed prevalence of carriage of ExPEC  
714 (9 of 12 healthy control subjects) from Martinez-Medina *et al.*<sup>40</sup>. Finally, for *S.*  
715 *aureus*, we adopt  $0.2 \leq Y \leq 0.6$  based on Bogaert *et al.*<sup>32</sup>, which is based on the

716 observed range of *S. aureus* colonization in Dutch children, with a slightly wider  
717 range to capture more variation between European countries.

718

719 *MCMC details*

720

721 Following the differential evolution MCMC algorithm<sup>34</sup>, we run  $10n$  chains,  
722 where  $n$  is the number of free parameters in the model, *i.e.* 30 for *S. pneumoniae*  
723 (for which carriage duration is fixed at 1 month) and 40 for *E. coli* and *S. aureus*,  
724 for which carriage duration is not fixed. The burn-in period lasts 1,000 iterations,  
725 after which 100,000 samples from the posterior are taken across all chains.

726

727

728 Sources for antibiotic consumption and resistance prevalence data

729

730 We used data from the European Centre for Disease Prevention and Control  
731 (ECDC) and from the European Antimicrobial Resistance Surveillance Network  
732 (EARS-Net) to parameterize our models for the consumption of antibiotics and  
733 prevalence of antibiotic resistance in EU countries.

734

735 The ECDC provides information on antimicrobial consumption in defined daily  
736 doses (DDD) per 1000 inhabitants per day for participating countries, with  
737 antimicrobials broken down into categories as classified in the World Health  
738 Organisation's (WHO) Anatomical Therapeutic Chemical (ATC) Classification  
739 System. Consumption is classified into primary care and hospital use, with the  
740 majority of use in primary care. We focus on primary care usage only, as hospital

741 usage data is sparse and we are focusing on community-acquired bacterial  
742 carriage. The ECDC releases online publications summarizing consumption data  
743 (*e.g.* ref. 41) and maintains a queryable online database<sup>6</sup>.  
744  
745 EARS-Net, formerly EARSS, provides information on resistance levels as  
746 measured in invasive isolates of various bacterial pathogens isolated from blood  
747 and cerebrospinal fluid<sup>7, 8</sup>. We assume that invasive isolates are a sample of  
748 commensally-carried strains<sup>4</sup>. We summarize the data used and sources for the  
749 five data sets analysed (**Table S1**).

| Data set                                                                           | Consumption:<br><i>ATC code, sector, year, and source</i>                                           | Resistance:<br><i>Pathogen, resistance metric, year, and source</i>                |
|------------------------------------------------------------------------------------|-----------------------------------------------------------------------------------------------------|------------------------------------------------------------------------------------|
| <i>Streptococcus pneumoniae</i> penicillin resistance, 2007 (Figs. 1–2, main text) | J01C (Beta-lactam antibacterials, penicillins), primary care, 2007 (ECDC 2017b, 2014 <sup>†</sup> ) | <i>S. pneumoniae</i> , percentage non-susceptible to penicillin, 2007 (EARSS 2007) |
| <i>Escherichia coli</i> fluoroquinolone resistance, 2015 (Fig. 3a, main text)      | J01MA (Fluoroquinolones), primary care, 2015 (ECDC 2017b)                                           | <i>E. coli</i> , percentage resistant to fluoroquinolones, 2015 (ECDC 2017a)       |
| <i>E. coli</i> penicillin resistance, 2015 (Fig. 3b, main text)                    | J01C (Beta-lactam antibacterials, penicillins), primary care, 2015 (ECDC 2017b)                     | <i>E. coli</i> , percentage resistant to aminopenicillins, 2015 (ECDC 2017a)       |
| <i>Staphylococcus aureus</i> meticillin resistance, 2015 (Fig. 3c, main text)      | J01C (Beta-lactam antibacterials, penicillins), primary care, 2015 (ECDC 2017b)                     | <i>S. aureus</i> , percentage resistant to meticillin (MRSA), 2015 (ECDC 2017a)    |
| <i>S. pneumoniae</i> macrolide resistance, 2015 (Fig. 3d, main text)               | J01FA (Macrolides), primary care, 2015 (ECDC 2017b)                                                 | <i>S. pneumoniae</i> , percentage non-susceptible to macrolides, 2015 (ECDC 2017a) |

750

751 **Table S1.** Data sources for antibiotic consumption and antimicrobial resistance

752 across five pathogen-drug combinations. <sup>†</sup>Portugal recorded no penicillin

753 consumption for 2007 in the online ECDC database<sup>6</sup>, but the 2011 ECDC report<sup>41</sup>

754 provides the corrected figure of 11.3 DDD per 1000 inhabitants per day for 2007.

755

756

757 **Supporting information**

758

759 **S1. Posterior distributions from model fitting**

760

761 Here, we show the posterior distributions from model fitting from the main

762 analysis (**Fig. S1–S5**).

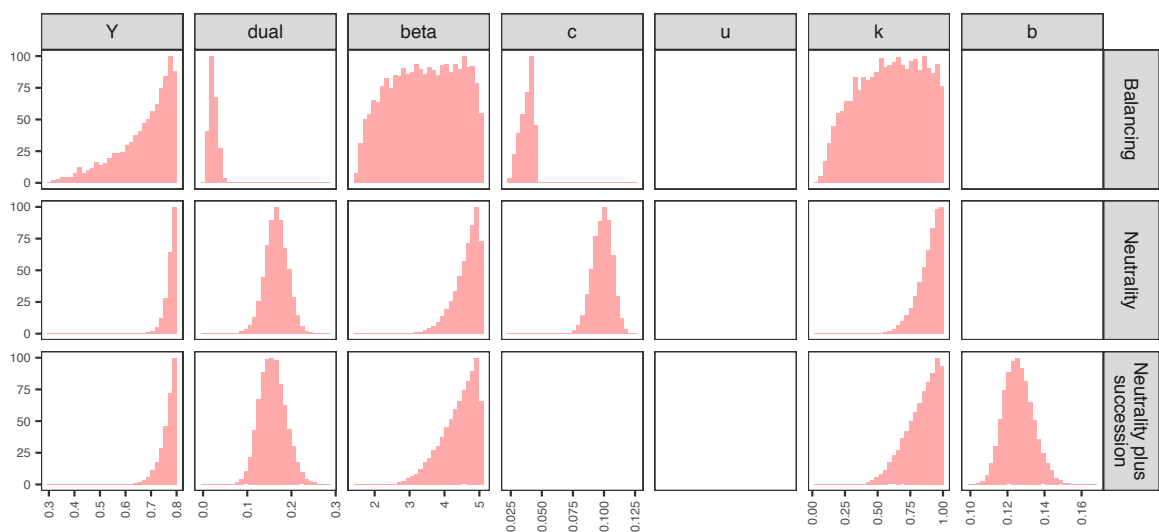

763

764 **Figure S1** | Posterior distribution for *S. pneumoniae* / penicillin, 2007. *Y* gives

765 the overall prevalence of carriage (whether single or dual) in the population;

766 *dual* gives the fraction of carriers who carry both sensitive and resistant strains;

767 *beta* gives the transmission parameter; *c* gives the transmission cost of

768 resistance; *u* gives the clearance rate (if the clearance rate is subject to fitting; for

769 *S. pneumoniae*,  $u = 1$ ); *k* gives the efficiency of recolonisation, and *b* gives the

770 within-host rate of succession (see *Methods*, main text, for details).

771

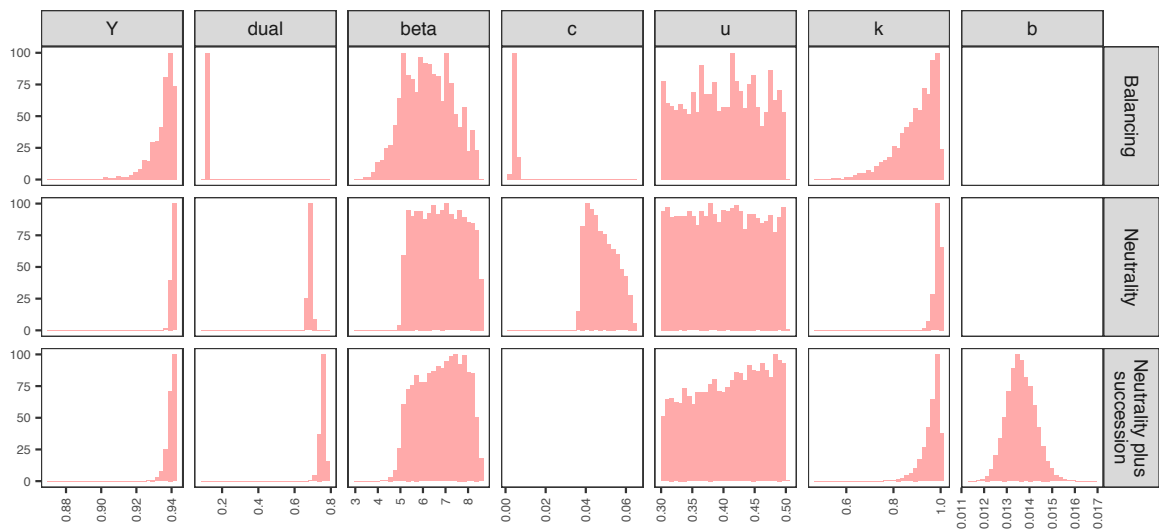

772

773 **Figure S2** | Posterior distribution for *E. coli* / fluoroquinolones, 2015. See Fig. S1

774 for details.

775

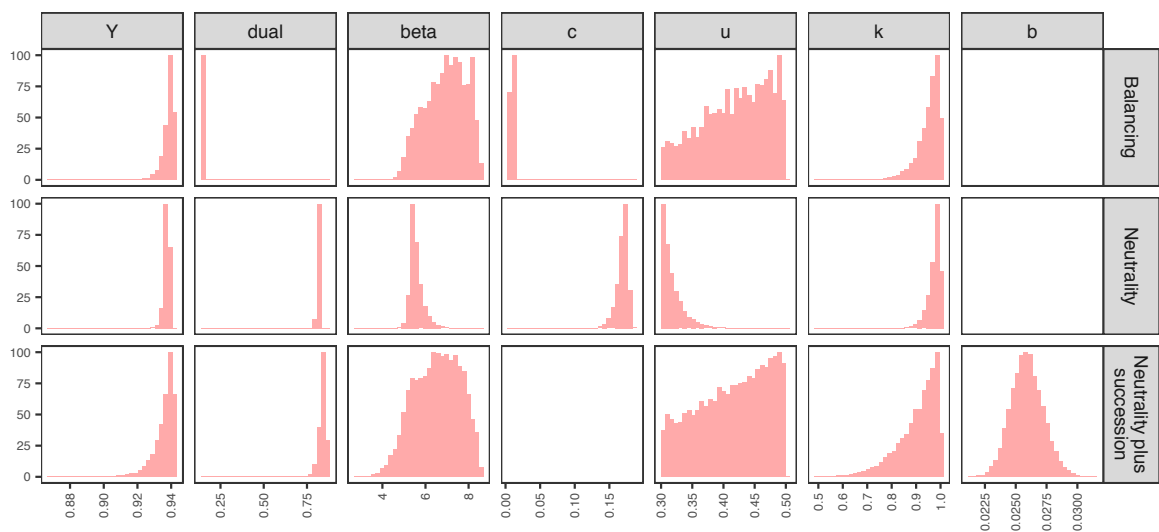

776

777 **Figure S3** | Posterior distribution for *E. coli* / penicillin, 2015. See Fig. S1 for

778 details.

779



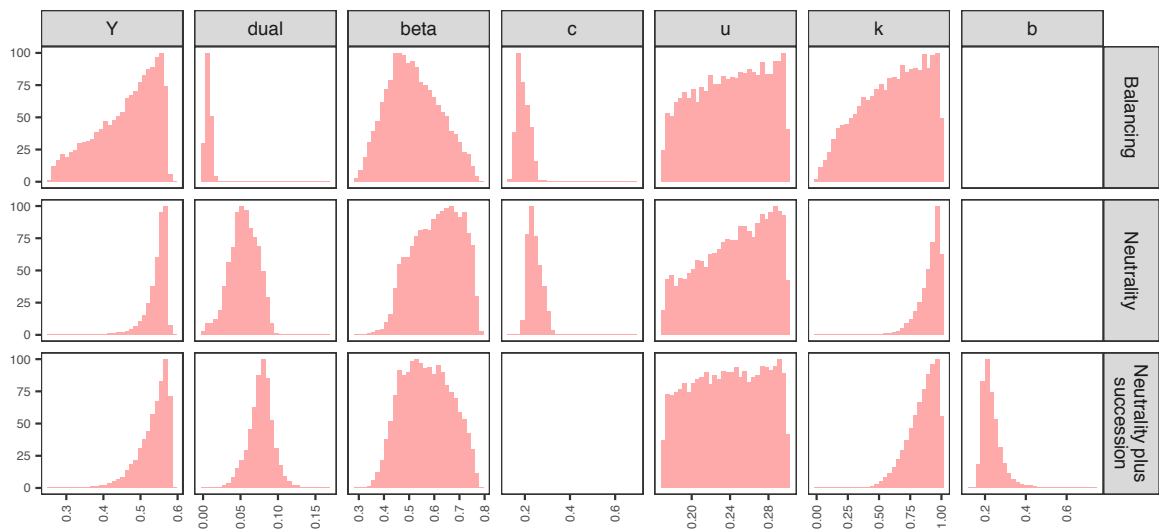

780

781 **Figure S4** | Posterior distribution for *S. aureus* / meticillin, 2015. See Fig. S1 for

782 details.

783

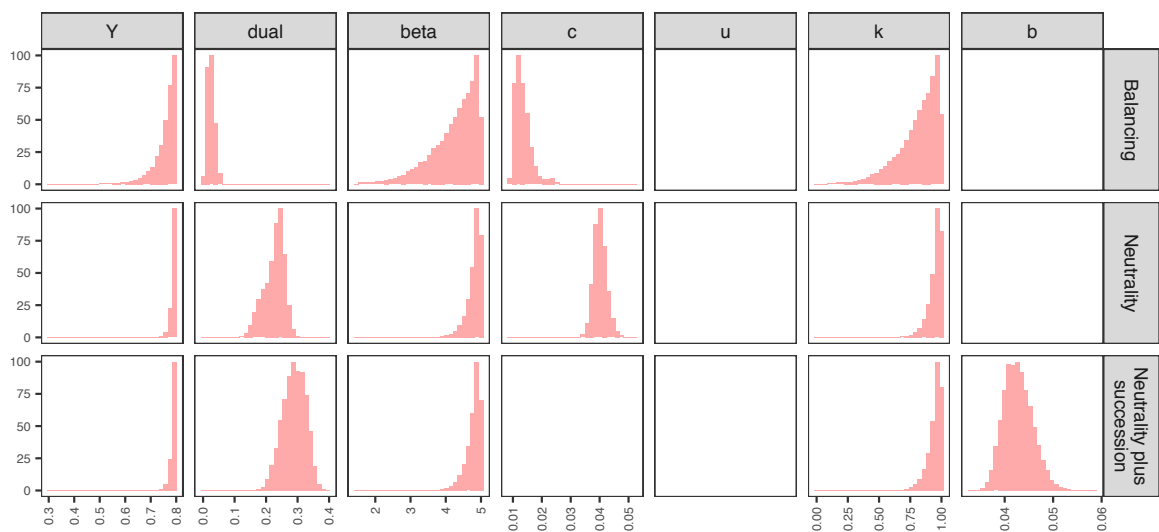

784

785 **Figure S5** | Posterior distribution for *S. pneumoniae* / macrolides, 2015. See Fig.

786 S1 for details.

787

788 S2. Positive association between carriers:  $k > 1$

789

790 In the main analysis, we assume that  $k$  measures relative efficiency of co-  
791 colonisation compared to colonisation of an uncolonised host, and hence restrict  
792 our attention to  $k \leq 1$ . However, it is also possible to interpret  $k$  as capturing  
793 positive association between carriers, as increasing  $k$  increases transmission  
794 among carriers without impacting upon the overall prevalence of carriage in the  
795 population. Thus, it is possible to have  $k > 1$  reflecting this mechanism. Allowing  
796 for the range  $0 \leq k \leq 5$ , we find that (a) the fit of the within-host balancing model  
797 does not substantially improve and that (b) similar levels of coexistence are  
798 possible for the within-host neutral and within-host competition models with  
799 lower prevalence of carriage. Here, for illustration, we adopt more restrictive  
800 ranges on the prevalence of carriage:  $0.2 \leq Y \leq 0.4$  for *S. pneumoniae*,  $0.4 \leq Y \leq 0.8$   
801 for *E. coli*, and  $0.2 \leq Y \leq 0.4$  for *S. aureus* (**Fig. S6**).

802

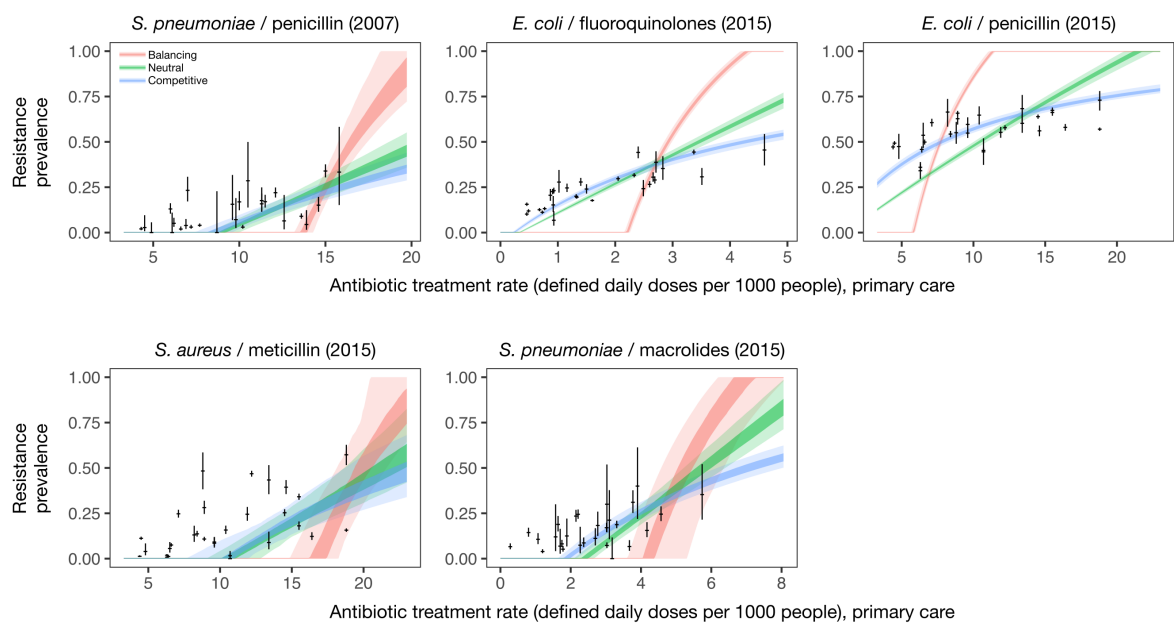

804 **Figure S6 | Model fits with  $0 \leq k \leq 5$ .**

805

806 Posterior distributions from model fitting with  $0 \leq k \leq 5$

807

808 Posterior distributions provided in **Figs. S7–S11**.

809

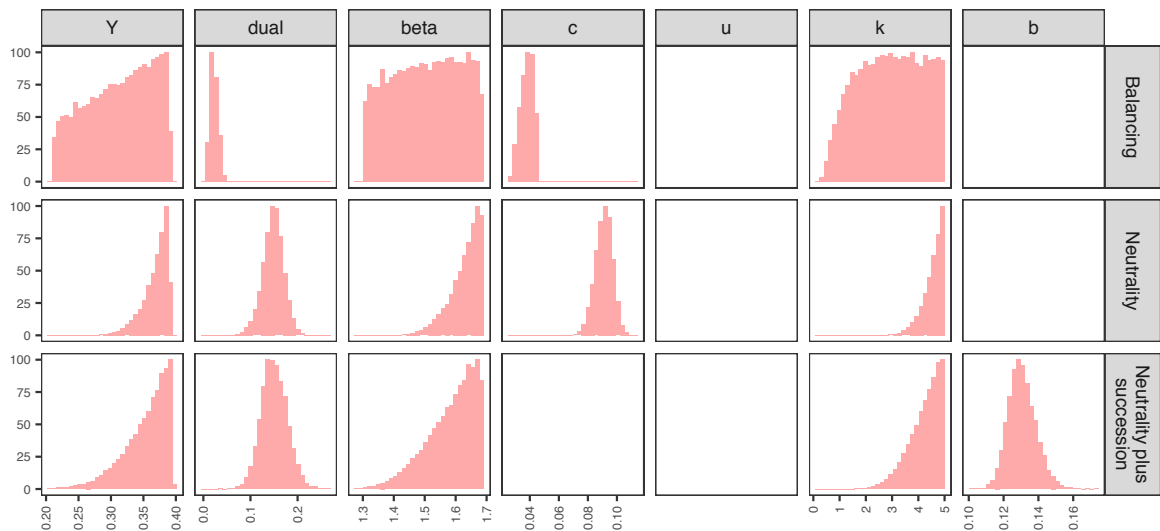

810

811 **Figure S7** | Posterior distribution for *S. pneumoniae* / penicillin (2007) data set

812 with  $0 \leq k \leq 5$ .

813

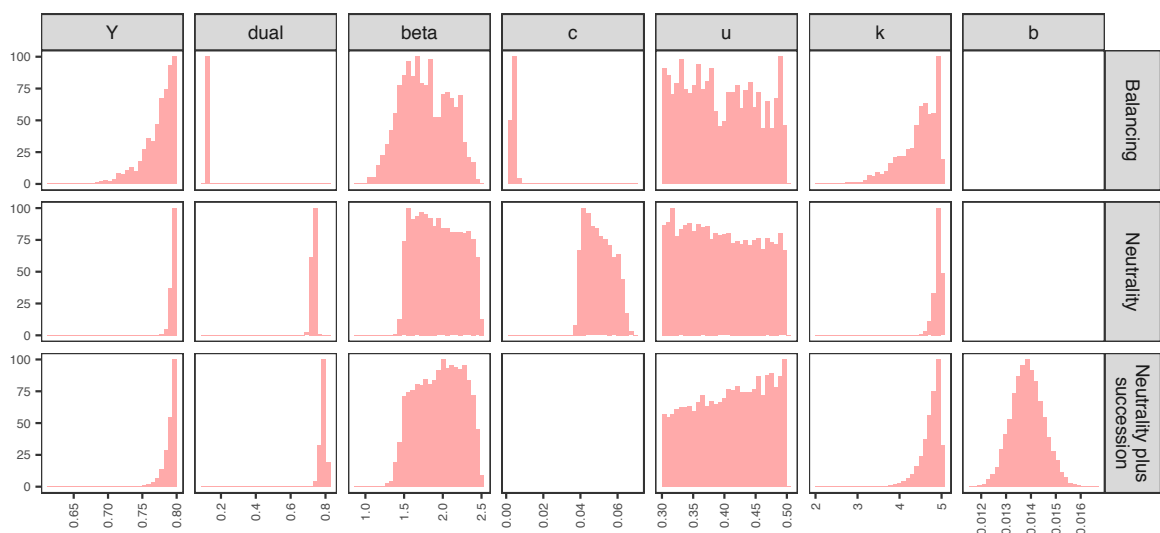

814

815 **Figure S8** | Posterior distribution for *E. coli* / fluoroquinolones (2015) data set

816 with  $0 \leq k \leq 5$ .

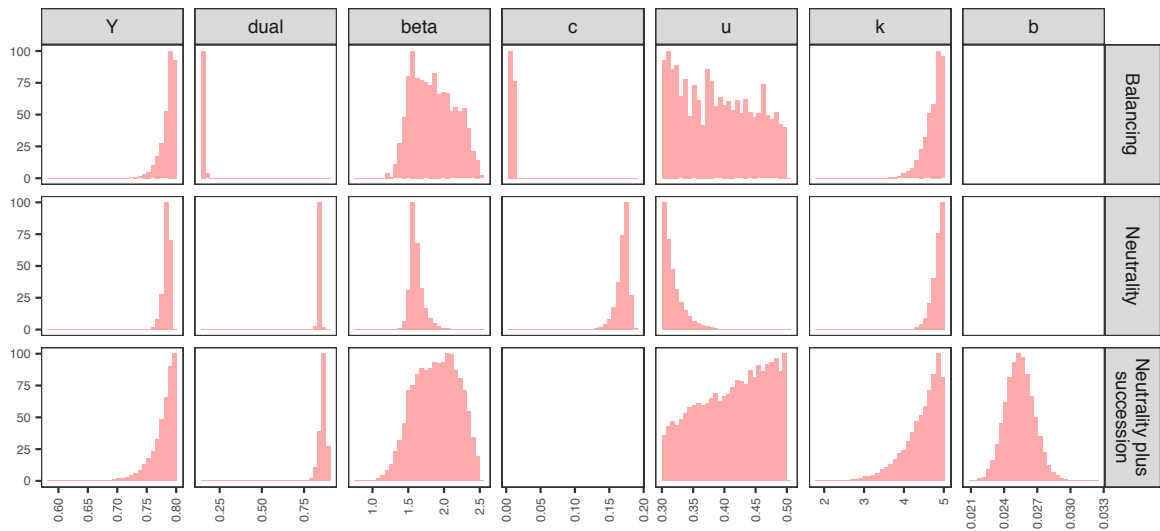

817

818 **Figure S9** | Posterior distribution for *E. coli* / penicillin (2015) data set with  $0 \leq$

819  $k \leq 5$ .

820

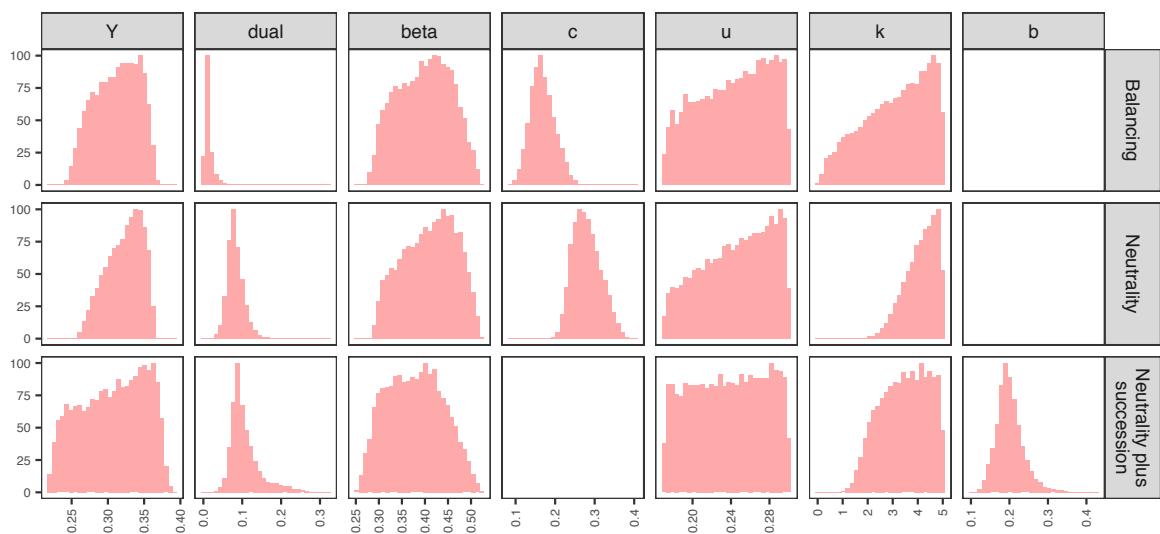

821

822 **Figure S10** | Posterior distribution for *S. aureus* / meticillin (2015) data set with

823  $0 \leq k \leq 5$ .

824

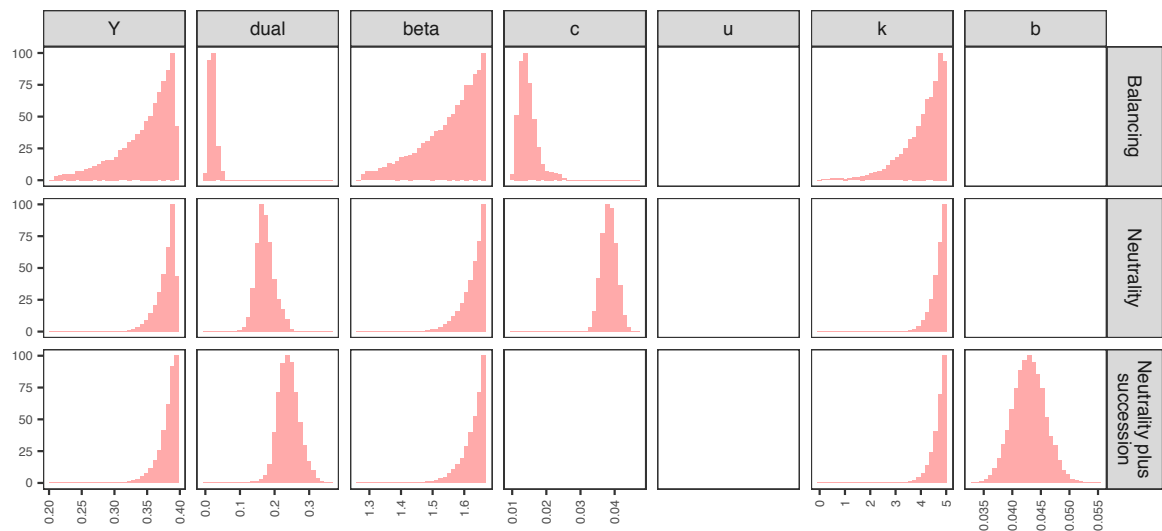

825

826 **Figure S11** | Posterior distribution for *S. pneumoniae* / macrolides (2015) data

827 set with  $0 \leq k \leq 5$ .

828

829 *Relative likelihoods from model fitting with  $0 \leq k \leq 5$*

830

831 We calculated the relative likelihood for the fitted models,  $M_i$ , by comparison of

832 the Akaike Information Criterion (AIC) of each model to that of the best model,  $M$

833 ( $\exp[(AIC(M) - AIC(M_i))/2]$ ) (**Table S2**).

834

| <b>Model</b>                                               | <b>Within-host<br/>balancing</b> | <b>Within-host<br/>neutrality</b> | <b>Within-host<br/>competition</b> |
|------------------------------------------------------------|----------------------------------|-----------------------------------|------------------------------------|
| <i>S. pneumoniae</i> /<br>penicillin (2007) ( $n =$<br>3)  | $4.82 \times 10^{-5}$            | 0.453                             | 1                                  |
| <i>E. coli</i> /<br>fluoroquinolones<br>(2015) ( $n = 4$ ) | $1.11 \times 10^{-127}$          | $1.03 \times 10^{-12}$            | 1                                  |
| <i>E. coli</i> / penicillin<br>(2015) ( $n = 4$ )          | $1.12 \times 10^{-161}$          | $1.34 \times 10^{-26}$            | 1                                  |

|                                                         |                        |                       |   |
|---------------------------------------------------------|------------------------|-----------------------|---|
| <i>S. aureus</i> / meticillin<br>(2015) ( $n = 4$ )     | $6.87 \times 10^{-4}$  | 0.696                 | 1 |
| <i>S. pneumoniae</i> /<br>macrolides (2015) ( $n = 3$ ) | $3.84 \times 10^{-14}$ | $1.33 \times 10^{-3}$ | 1 |

835

836 **Table S2** | Relative likelihoods for model fits with  $0 \leq k \leq 5$ . The number of  
837 parameters,  $n$ , is given for each model.

838

839 S3.  $S_R$ -to- $S$  clearance in within-host competition model

840

841 In the within-host neutral model with competition, within-host competition  
842 causes  $R_S$  carriers to transition into  $S_R$  carriers over time. However, an  
843 alternative model proposes that the minor complement of resistant cells in  $S_R$   
844 carriers may be outcompeted within the host over time, transitioning  $S_R$  carriers  
845 to  $S$  carriers. To verify the robustness of our results against the clearance of  
846 resistant cells from  $S_R$  carriers, we re-fit the the neutral model with within-host  
847 competition to the *S. pneumoniae* / penicillin data set assuming that  $S_R$  carriers  
848 transition to  $S$  carriers at double the rate of the  $R_S$  to  $S_R$  transition, i.e.  $2b$ . Adding  
849 this transition has a minimal impact on the model fit (**Fig. S12**). The relative  
850 likelihood of the model fitted with  $S_R$ -to- $S$  clearance is 0.926 compared to the  
851 model fitted without  $S_R$ -to- $S$  clearance.

852

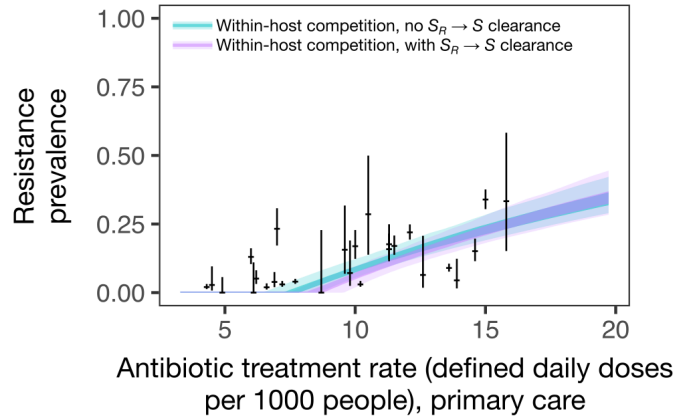

853

854 **Figure S12** | Model fits for *S. pneumoniae* / penicillin (2007) data set without  
 855 and with  $S_R$ -to- $S$  clearance.

856

857 S4. Pneumococcal coexistence without immune memory

858

859 We found that independent clearance of serotypes alone was insufficient to  
 860 support the high diversity of pneumococcal serotype carriage observed in  
 861 human populations with only four serotypes maintained (Fig. S13).

862

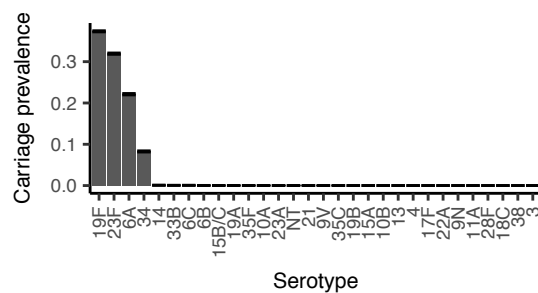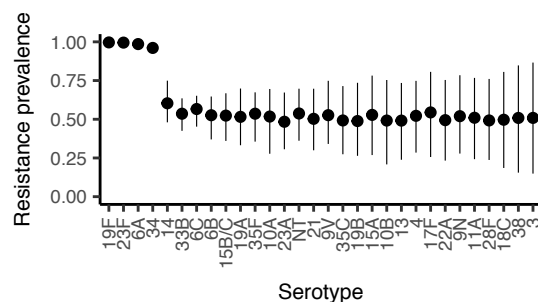

863

864

865 **Fig. S13** | As serotypes vary greatly in duration of carriage, the mechanism of  
866 independent clearance alone is not able to reproduce observed patterns of  
867 pneumococcal carriage or resistance prevalence, as all but the four serotypes  
868 with the highest duration of carriage are eliminated. Resistance prevalence is  
869 close to 50% for eliminated serotypes as stochastic importation of strains (see  
870 *Methods*) maintains carriage of both sensitive and resistant strains of each  
871 serotype at low prevalence.

872
